# Supplementary material
Source: MDPI journal article supplement (https://www.mdpi.com/2311-7524/8/10/958)
Supplement: s1 [file s1 › horticulturae-1906267-supplementary.pdf]

Table S1: Photographs of vine plants taken on June 23, 2020 showing the symptoms of infection by *Plasmopara viticola* on grapes and leaves. Artificial contamination was performed on May 28. Pre-treatments by foliar spraying were done on May 5, 12, 20, and 27, and June 8, 15, 24 with one of the following products: IODUS 2 Céréales® 90g per ha (reference), SL35x1: 5 g SL35 per ha, SL35x7: 35 g SL35 per ha, SL35x14: 70 g SL35 per ha.

| Treatments          | Grapes                                                                              | Leaves                                                                                |
|---------------------|-------------------------------------------------------------------------------------|---------------------------------------------------------------------------------------|
| Not treated control | 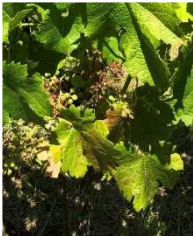   | 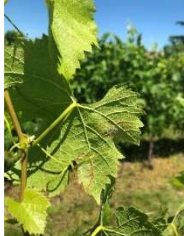   |
| IODUS 2 Céréales®   | 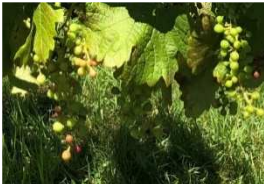  | 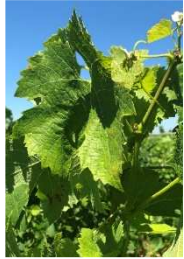  |
| SL35x1              | 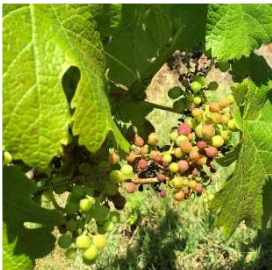 | 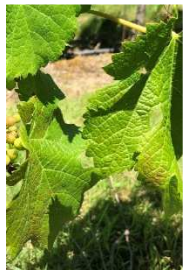 |
| SL35x7              | 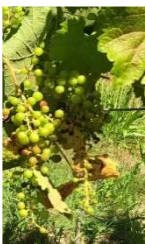 | 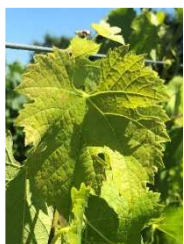 |
| SL35x14             | 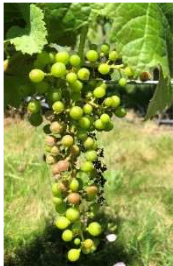 | 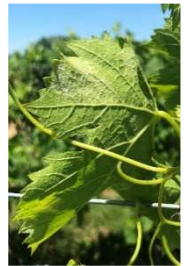 |
